# Supplementary material for: Quantifying differences in packaged food and drink purchases among households with diet-related cardiometabolic multi-morbidity: a cross-sectional analysis
Source: Springer Nature journal article supplement (doi:10.1186/s12889-022-14626-3), 2022-11-17
Supplement: MOESM1 [file 23723250]

Additional File 1. Covariate Categories

| Covariate                        | Covariate Categorization                                                                                                                                                                                                                                                                                                                                                          |
|----------------------------------|-----------------------------------------------------------------------------------------------------------------------------------------------------------------------------------------------------------------------------------------------------------------------------------------------------------------------------------------------------------------------------------|
| BMI                              | Kg/m <sup>2</sup> (self-reported from height & weight)                                                                                                                                                                                                                                                                                                                            |
| Physical Activity                | Most days<br>Somedays<br>Rarely/never                                                                                                                                                                                                                                                                                                                                             |
| Family Size                      | One Person<br>Two People<br>Three People<br>Four People<br>Five People<br>Six People<br>Seven People<br>Eight or more People                                                                                                                                                                                                                                                      |
| Income                           | \$00,000 TO \$ 9,999 PER YR<br>\$10,000 TO \$11,999 PER YR<br>\$12,000 TO \$14,999 PER YR<br>\$15,000 TO \$19,999 PER YR<br>\$20,000 TO \$24,999 PER YR<br>\$25,000 TO \$34,999 PER YR<br>\$35,000 TO \$44,999 PER YR<br>\$45,000 TO \$54,999 PER YR<br>\$55,000 TO \$64,999 PER YR<br>\$65,000 TO \$74,999 PER YR<br>\$75,000 TO \$99,999 PER YR<br>\$100,000 AND GREATER PER YR |
| Race                             | WHITE<br>BLACK<br>HISPANIC<br>ASIAN<br>OTHER                                                                                                                                                                                                                                                                                                                                      |
| Head of Household Age            | 18 - 29<br>30 - 34<br>35 - 44<br>45 - 54<br>55 - 64<br>65 & OVER                                                                                                                                                                                                                                                                                                                  |
| Head of Household Education      | SOME GRADE SCHOOL OR LESS<br>COMPLETED GRADE SCHOOL<br>SOME HIGH SCHOOL<br>GRADUATED HIGH SCHOOL<br>TECHNICAL SCHOOL<br>SOME COLLEGE<br>GRADUATED FROM COLLEGE<br>POST GRADUATE WORK                                                                                                                                                                                              |
| Head of Household Martial Status | SINGLE<br>MARRIED<br>DIVORCED<br>WIDOWED<br>SEPARATED                                                                                                                                                                                                                                                                                                                             |
