# Supplementary material for: Quantifying differences in packaged food and drink purchases among households with diet-related cardiometabolic multi-morbidity: a cross-sectional analysis
Source: Springer Nature journal article supplement (doi:10.1186/s12889-022-14626-3), 2022-11-17
Supplement: MOESM2 [file 23723250]

Additional File 2. Outcome, Main Exposures, and Covariate Variable Operationalization

|                       | <b>Variable</b>                               | <b>Definition</b>                                                                                                                                                                                                                                                                       |
|-----------------------|-----------------------------------------------|-----------------------------------------------------------------------------------------------------------------------------------------------------------------------------------------------------------------------------------------------------------------------------------------|
| <b>Outcome</b>        | Diet-related cardiometabolic multi-morbidity  | Household head(s) self reporting 2 or more diet-related cardiometabolic chronic conditions                                                                                                                                                                                              |
|                       |                                               | Diet-related cardiometabolic chronic conditions include: angina, atherosclerosis, hyperlipidemia, congestive heart failure, diabetes, myocardial infarction, hypertension, or stroke                                                                                                    |
| <b>Main Exposures</b> | Weighed per capita                            | Main exposure variables controlled for household size and age composition of household members                                                                                                                                                                                          |
|                       |                                               | Household members weighted by age to account for the expected daily caloric requirements relative to the recommended 2,000 calorie/day for adults. Age 13 years + were given a weight of 1, age 6-12 years were given a weight of 0.75, and age 2-5 years were given a weight of 0.575. |
|                       | Packaged Food & Drink <i>Quantity</i>         | Servings per capita                                                                                                                                                                                                                                                                     |
|                       |                                               | Servings defined as total volume of item/serving size of item, with serving size as content consumed typically per eating occasion                                                                                                                                                      |
|                       | Packaged Food & Drink <i>Quality</i>          | Calories, protein, carbohydrates, fat, fiber, and sodium, expressed as weighed per capita nutrients per serving                                                                                                                                                                         |
|                       |                                               | Servings defined as total volume of item/serving size of item, with serving size as content consumed typically per eating occasion                                                                                                                                                      |
|                       |                                               | Calories, protein, carbohydrates, fat, fiber, and sodium calculated from all purchases across all 13 food and drink categories                                                                                                                                                          |
|                       | Packaged Food & Drink <i>Quantity*Quality</i> | Calories, protein, carbohydrates, fat, fiber, and sodium weighed per capita                                                                                                                                                                                                             |
|                       |                                               | Calories, protein, carbohydrates, fat, fiber, and sodium calculated from total monthly purchases across all 13 food and drink categories                                                                                                                                                |
|                       | <b>Covariates</b>                             | BMI                                                                                                                                                                                                                                                                                     |
| Age                   |                                               | Age of household head                                                                                                                                                                                                                                                                   |
| Education             |                                               | Education of household head, categories include: some high school, high school diploma, some college, college degree, post graduate work or technical school                                                                                                                            |
| Physical Activity     |                                               | Weekly physical activity of household head, categories include: rarely/never, some days, most days (reference is most days)                                                                                                                                                             |
| Race                  |                                               | White, Black, Hispanic, Asian, Other                                                                                                                                                                                                                                                    |
| Income                |                                               | Household income in dollars, categories in 10K increments from \$0-9,999 (reference) to \$100,000+                                                                                                                                                                                      |
| Family Size           |                                               | Number people living in household, categories from 1 (reference) to 8+ people                                                                                                                                                                                                           |
| Marital Status        |                                               | Household head marital status, categories include married, divorced, separated, widowed                                                                                                                                                                                                 |
| Survey Year           |                                               | Year of household data collection, categories include 2006 (reference), 2007, and 2008                                                                                                                                                                                                  |
