# Supplementary material for: Quantifying differences in packaged food and drink purchases among households with diet-related cardiometabolic multi-morbidity: a cross-sectional analysis
Source: Springer Nature journal article supplement (doi:10.1186/s12889-022-14626-3), 2022-11-17
Supplement: MOESM3 [file 23723250]

Additional File 3. Average Nutrient Content Per Serving\* with Standard Deviations from 13 Food and Drink Categories

| <b>Food Category</b>                                                                                         | <b>Calories (kcal)</b> | <b>Protein (g)</b> | <b>Carbohydrates (g)</b> | <b>Fat (g)</b> | <b>Fiber (g)</b> | <b>Sodium (mg)</b> |
|--------------------------------------------------------------------------------------------------------------|------------------------|--------------------|--------------------------|----------------|------------------|--------------------|
| <i>Perceived Healthy</i>                                                                                     |                        |                    |                          |                |                  |                    |
| <i>Cereals</i>                                                                                               | 202.6 (15.3)           | 4.3 (1.6)          | 43.9 (3.5)               | 2.1 (1.0)      | 3.8 (1.6)        | 270.7 (73.2)       |
| <i>Cheese</i>                                                                                                | 98.2 (10.3)            | 6.6 (0.8)          | 1.1 (0.6)                | 7.4 (1.1)      | 0.00 (0.0)       | 262.4 (62.7)       |
| <i>Crackers</i>                                                                                              | 135.4 (14.3)           | 2.4 (0.6)          | 20.0 (2.3)               | 5.1 (1.3)      | 0.6 (0.7)        | 260.5 (50.3)       |
| <i>Juices</i>                                                                                                | 100.2 (27.1)           | 0.70 (0.6)         | 24.3 (6.7)               | 0.1 (0.7)      | 0.2 (0.4)        | 71.5 (100.3)       |
| <i>Milk</i>                                                                                                  | 122.9 (24.8)           | 8.1 (0.6)          | 13.4 (2.7)               | 3.9 (2.5)      | 0.0 (0.2)        | 132.1 (16.1)       |
| <i>Soup</i>                                                                                                  | 216.8 (196.9)          | 6.8 (4.8)          | 30.4 (31.0)              | 7.0 (7.0)      | 2.6 (2.5)        | 2090.2 (3291.0)    |
| <i>Yogurt</i>                                                                                                | 172.5 (41.1)           | 7.7 (1.5)          | 31.1 (8.0)               | 1.7 (1.5)      | 0.4 (0.8)        | 121.2 (21.7)       |
| <i>Perceived Unhealthy</i>                                                                                   |                        |                    |                          |                |                  |                    |
| <i>CSDs</i>                                                                                                  | 60.5 (45.1)            | 0.00 (0.0)         | 16.3 (12.1)              | 0.00 (0.0)     | 0.0 (0.0)        | 29.2 (10.5)        |
| <i>Cookies</i>                                                                                               | 138.1 (12.2)           | 1.3 (0.4)          | 20.4 (1.7)               | 5.9 (1.2)      | 0.4 (0.4)        | 108.0 (67.9)       |
| <i>Frozen Dinners</i>                                                                                        | 262.0 (71.4)           | 11.3 (2.3)         | 29.7 (7.8)               | 10.6 (3.9)     | 2.2 (0.6)        | 603.1 (138.6)      |
| <i>Ice Cream</i>                                                                                             | 149.4 (30.0)           | 2.6 (0.6)          | 19.5 (3.2)               | 7.0 (2.5)      | 0.4 (0.5)        | 56.9 (13.6)        |
| <i>Processed Meats</i>                                                                                       | 129.6 (30.6)           | 7.8 (2.1)          | 1.6 (1.1)                | 10.1 (3.2)     | 0.0 (0.2)        | 532.4 (154.7)      |
| <i>Salty Snacks</i>                                                                                          | 148.0 (20.0)           | 2.2 (0.7)          | 17.9 (2.3)               | 7.7 (2.4)      | 1.0 (0.3)        | 221.1 (82.4)       |
| *Expressed as one-year monthly average weighed per capita nutrient per serving, average (standard deviation) |                        |                    |                          |                |                  |                    |
