# Supplementary material for: Quantifying differences in packaged food and drink purchases among households with diet-related cardiometabolic multi-morbidity: a cross-sectional analysis
Source: Springer Nature journal article supplement (doi:10.1186/s12889-022-14626-3), 2022-11-17
Supplement: MOESM4 [file 23723250]

Additional File 4. One-Year Monthly Average Weighed Per Capita Calories (kcal) Per Food Group, Stratified by Diet-Related Cardiometabolic Multi-Morbid Households

|                                                                                                                                  | <i>Non-Diet Related Multi-Morbid Household mean (SD)</i> | <i>Diet Related Multi-Morbid Household mean (SD)</i> | <i>P-value*</i> |
|----------------------------------------------------------------------------------------------------------------------------------|----------------------------------------------------------|------------------------------------------------------|-----------------|
| <b>N Households</b>                                                                                                              | 18955                                                    | 3795                                                 |                 |
| <b>CSDs (kcal/capita)</b>                                                                                                        | 1394.6 (2339.0)                                          | 1531.7 (2887.8)                                      | 0.002**         |
| <b>Cereals (kcal/capita)</b>                                                                                                     | 1810.8 (1770.8)                                          | 1756.0 (1909.8)                                      | 0.093           |
| <b>Cheese (kcal/capita)</b>                                                                                                      | 1377.0 (1111.5)                                          | 1375.01 (1479.5)                                     | 0.927           |
| <b>Cookies (kcal/capita)</b>                                                                                                     | 1260.2 (1573.4)                                          | 1524.1 (1787.5)                                      | <0.001**        |
| <b>Crackers (kcal/capita)</b>                                                                                                    | 1170.0 (1170.7)                                          | 1327.3 (1783.1)                                      | <0.001*         |
| <b>Frozen Dinners (kcal/capita)</b>                                                                                              | 1387.5 (1516.7)                                          | 1348.6 (1683.4)                                      | 0.168           |
| <b>Ice Cream (kcal/capita)</b>                                                                                                   | 1150.1 (1456.0)                                          | 1276.9 (1551.8)                                      | <0.001**        |
| <b>Juices (kcal/capita)</b>                                                                                                      | 1003.2 (1161.0)                                          | 1019.4 (1314.5)                                      | 0.449           |
| <b>Milk (kcal/capita)</b>                                                                                                        | 2235.4 (2076.6)                                          | 2331.6 (2380.8)                                      | 0.012           |
| <b>Processed Meats (kcal/capita)</b>                                                                                             | 1325.7 (1212.8)                                          | 1693.5 (1798.2)                                      | <0.001**        |
| <b>Salty Snacks (kcal/capita)</b>                                                                                                | 2206.0 (2000.7)                                          | 2218.0 (2138.2)                                      | 0.741           |
| <b>Soup (kcal/capita)</b>                                                                                                        | 443.8 (536.4)                                            | 519.0 (816.6)                                        | <0.001**        |
| <b>Yogurt (kcal/capita)</b>                                                                                                      | 414.9 (576.7)                                            | 370.3 (548.9)                                        | <0.001**        |
| *P-value calculated using Chi square and 2-sample T-test for categorical and continuous variables, respectively                  |                                                          |                                                      |                 |
| **Statistically significant using Holms step-down correction applied for multiple comparison across 13 food and drink categories |                                                          |                                                      |                 |
