# Supplementary material for: Quantifying differences in packaged food and drink purchases among households with diet-related cardiometabolic multi-morbidity: a cross-sectional analysis
Source: Springer Nature journal article supplement (doi:10.1186/s12889-022-14626-3), 2022-11-17
Supplement: MOESM5 [file 23723250]

Additional File 5. One-Year Monthly Average Weighed Per Capita Serving (#) Per Food Group, Stratified by Diet-Related Cardiometabolic Multi-Morbid Households

|                                                                                                                                  | <i>Non-Diet Related Multi-Morbid Household mean (SD)</i> | <i>Diet Related Multi-Morbid Household mean (SD)</i> | <i>P-value*</i> |
|----------------------------------------------------------------------------------------------------------------------------------|----------------------------------------------------------|------------------------------------------------------|-----------------|
| <b>N Households</b>                                                                                                              | 18955                                                    | 3795                                                 |                 |
| <b>CSDs (servings/capita)</b>                                                                                                    | 26.0 (32.9)                                              | 33.5 (43.9)                                          | <0.001**        |
| <b>Cereals (servings/capita)</b>                                                                                                 | 8.9 (8.7)                                                | 8.7 (9.4)                                            | 0.164           |
| <b>Cheese (servings/capita)</b>                                                                                                  | 14.0 (11.2)                                              | 14.0 (14.5)                                          | 0.989           |
| <b>Cookies (servings/capita)</b>                                                                                                 | 9.1 (11.2)                                               | 11.0 (12.7)                                          | <0.001**        |
| <b>Crackers (servings/capita)</b>                                                                                                | 8.6 (8.4)                                                | 9.8 (12.1)                                           | <0.001**        |
| <b>Frozen Dinners (servings/capita)</b>                                                                                          | 5.5 (6.3)                                                | 5.6 (7.4)                                            | 0.387           |
| <b>Ice Cream (servings/capita)</b>                                                                                               | 7.8 (10.0)                                               | 8.9 (10.9)                                           | <0.001**        |
| <b>Juices (servings/capita)</b>                                                                                                  | 9.7 (10.8)                                               | 10.3 (12.5)                                          | 0.004**         |
| <b>Milk (servings/capita)</b>                                                                                                    | 18.7 (17.2)                                              | 19.4 (19.9)                                          | 0.038           |
| <b>Processed Meats (servings/capita)</b>                                                                                         | 10.2 (8.9)                                               | 12.9 (13.0)                                          | <0.001**        |
| <b>Salty Snacks (servings/capita)</b>                                                                                            | 14.9 (13.1)                                              | 14.9 (14.4)                                          | 0.97            |
| <b>Soup (servings/capita)</b>                                                                                                    | 2.4 (2.5)                                                | 2.9 (3.1)                                            | <0.001**        |
| <b>Yogurt (servings/capita)</b>                                                                                                  | 2.5 (3.4)                                                | 2.3 (3.4)                                            | 0.013           |
| *P-value calculated using Chi square and 2-sample T-test for categorical and continuous variables, respectively                  |                                                          |                                                      |                 |
| **Statistically significant using Holms step-down correction applied for multiple comparison across 13 food and drink categories |                                                          |                                                      |                 |
