# Supplementary material for: Quantifying differences in packaged food and drink purchases among households with diet-related cardiometabolic multi-morbidity: a cross-sectional analysis
Source: Springer Nature journal article supplement (doi:10.1186/s12889-022-14626-3), 2022-11-17
Supplement: MOESM6 [file 23723250]

Additional File 6. One-Year Monthly Average Weighed Per Capita Calories (kcal) Per Serving Per Food Group, Stratified by Diet-Related Cardiometabolic Multi-Morbid Households

|                                                                                                                                 | <i>Non-Diet Related Multi-Morbid Household mean (SD)</i> | <i>Diet Related Multi-Morbid Household mean (SD)</i> | <i>P-value*</i> |
|---------------------------------------------------------------------------------------------------------------------------------|----------------------------------------------------------|------------------------------------------------------|-----------------|
| <b>N Households</b>                                                                                                             | 18955                                                    | 3795                                                 |                 |
| <b>CSDs (kcal/serving)</b>                                                                                                      | 62.3 (45.2)                                              | 51.8 (43.7)                                          | <0.001**        |
| <b>Cereals (kcal/serving)</b>                                                                                                   | 202.7 (13.8)                                             | 202.2 (21.5)                                         | 0.046           |
| <b>Cheese (kcal/serving)</b>                                                                                                    | 98.2 (10.2)                                              | 98.2 (10.7)                                          | 0.878           |
| <b>Cookies (kcal/serving)</b>                                                                                                   | 138.0 (12.4)                                             | 138.3 (11.5)                                         | 0.282           |
| <b>Crackers (kcal/serving)</b>                                                                                                  | 135.4 (14.6)                                             | 135.1 (13.1)                                         | 0.296           |
| <b>Frozen Dinners (kcal/serving)</b>                                                                                            | 264.0 (71.3)                                             | 251.8 (70.9)                                         | <0.001**        |
| <b>Ice Cream (kcal/serving)</b>                                                                                                 | 149.9 (30.4)                                             | 147.3 (27.5)                                         | <0.001**        |
| <b>Juices (kcal/serving)</b>                                                                                                    | 100.8 (26.0)                                             | 97.1 (31.7)                                          | <0.001**        |
| <b>Milk (kcal/serving)</b>                                                                                                      | 122.7 (24.9)                                             | 123.6 (24.2)                                         | 0.045           |
| <b>Processed Meats (kcal/serving)</b>                                                                                           | 129.3 (31.0)                                             | 131.0 (28.5)                                         | 0.002**         |
| <b>Salty Snacks (kcal/serving)</b>                                                                                              | 147.7 (20.0)                                             | 149.3 (20.2)                                         | <0.001**        |
| <b>Soup (kcal/serving)</b>                                                                                                      | 218.3 (203.5)                                            | 209.4 (159.5)                                        | 0.011           |
| <b>Yogurt (kcal/serving)</b>                                                                                                    | 173.3 (40.7)                                             | 167.9 (42.8)                                         | <0.001**        |
| *P-value calculated using Chi square and 2-sample T-test for categorical and continuous variables, respectively                 |                                                          |                                                      |                 |
| *Statistically significant using Holms step-down correction applied for multiple comparison across 13 food and drink categories |                                                          |                                                      |                 |
