# Supplementary material for: Quantifying differences in packaged food and drink purchases among households with diet-related cardiometabolic multi-morbidity: a cross-sectional analysis
Source: Springer Nature journal article supplement (doi:10.1186/s12889-022-14626-3), 2022-11-17
Supplement: MOESM7 [file 23723250]

Additional File 7. Unadjusted associations for 3 nutritional profile metrics across all food and drink categories<sup>a</sup> and grouped into those perceived as healthy<sup>b</sup> and unhealthy<sup>c</sup>, stratified by diet-related cardiometabolic multi-morbid household status, when including baked goods/desserts and candy/confectionary

| <b>Outcome Status</b>                                   | <i>Non-Diet Related Multi-Morbid Household mean (SD)</i> | <i>Diet Related Multi-Morbid Household mean (SD)</i> | <i>P-value<sup>d</sup></i> |
|---------------------------------------------------------|----------------------------------------------------------|------------------------------------------------------|----------------------------|
| <b>N households</b>                                     | 18955                                                    | 3795                                                 |                            |
| <b>Quantity Nutritional Profile<sup>e</sup></b>         |                                                          |                                                      |                            |
| <b>Servings (#/capita)</b>                              | 182.9 (95.8)                                             | 205.2 (126.9)                                        | 0.00 <sup>h</sup>          |
| <b>Servings Healthy (#/capita)</b>                      | 63.2 (35.0)                                              | 65.4 (45.7)                                          | 0.00 <sup>h</sup>          |
| <b>Servings Unhealthy (#/capita)</b>                    | 119.7 (74.7)                                             | 139.8 (95.8)                                         | 0.00 <sup>h</sup>          |
| <b>Quantity-Quality Nutritional Profile<sup>f</sup></b> |                                                          |                                                      |                            |
| <b>Protein (g/capita)</b>                               | 677.8 (338.3)                                            | 729.3 (458.1)                                        | 0.00 <sup>h</sup>          |
| <b>Protein Healthy (g/capita)</b>                       | 337.4 (204.6)                                            | 344.2 (259.2)                                        | 0.076                      |
| <b>Protein Unhealthy (g/capita)</b>                     | 340.4 (193.9)                                            | 385.1 (255.6)                                        | 0.00 <sup>h</sup>          |
| <b>Carbohydrates (g/capita)</b>                         | 3522.3 (1974.2)                                          | 3804.0 (2429.7)                                      | 0.00 <sup>h</sup>          |
| <b>Carbohydrates Healthy(g/capita)</b>                  | 1165.4 (732.6)                                           | 1188.2 (925.1)                                       | 0.096                      |
| <b>Carbohydrates Unhealthy (g/capita)</b>               | 2356.9 (1563.1)                                          | 2615.8 (1832.7)                                      | 0.00 <sup>h</sup>          |
| <b>Fat (g/capita)</b>                                   | 832.5 (471.0)                                            | 922.1 (608.2)                                        | 0.00 <sup>h</sup>          |
| <b>Fat Healthy (g/capita)</b>                           | 247.5 (155.3)                                            | 256.5 (219.1)                                        | 0.00 <sup>h</sup>          |
| <b>Fat Unhealthy (g/capita)</b>                         | 585.0 (373.4)                                            | 665.6 (452.2)                                        | 0.00 <sup>h</sup>          |
| <b>Fiber (g/capita)</b>                                 | 130.4 (78.6)                                             | 140.8 (94.3)                                         | 0.00 <sup>h</sup>          |
| <b>Fiber Healthy (g/capita)</b>                         | 47.2 (44.9)                                              | 48.6 (48.5)                                          | 0.093                      |
| <b>Fiber Unhealthy (g/capita)</b>                       | 83.2 (53.0)                                              | 92.2 (63.9)                                          | 0.00 <sup>h</sup>          |
| <b>Sodium (mg/capita)</b>                               | 37526.4 (19377.2)                                        | 42407.4 (30159.6)                                    | 0.00 <sup>h</sup>          |
| <b>Sodium Healthy (g/capita)</b>                        | 14894.7 (8456.1)                                         | 16435.2 (15376.7)                                    | 0.00 <sup>h</sup>          |
| <b>Sodium Unhealthy (g/capita)</b>                      | 22631.7 (13406.1)                                        | 25972.2 (17925.3)                                    | 0.00 <sup>h</sup>          |
| <b>Calories (kcal/capita)</b>                           | 24023.3 (12719.8)                                        | 26117.3 (16227.5)                                    | 0.00 <sup>h</sup>          |
| <b>Calories Healthy (kcal/capita)</b>                   | 8211.0 (4625.3)                                          | 8412.9 (6270.5)                                      | 0.02                       |
| <b>Calories Unhealthy (kcal/capita)</b>                 | 15812.3 (9821.9)                                         | 17704.4 (11712.1)                                    | 0.00 <sup>h</sup>          |
| <b>Quality Nutritional Profiles<sup>g</sup></b>         |                                                          |                                                      |                            |
| <b>Protein (g/serving)</b>                              | 3.8 (0.84)                                               | 3.8 (0.82)                                           | 0.00 <sup>h</sup>          |
| <b>Protein Healthy (g/serving)</b>                      | 1.91 (0.80)                                              | 1.84 (0.76)                                          | 0.00 <sup>h</sup>          |
| <b>Protein Unhealthy (g/serving)</b>                    | 1.89 (0.55)                                              | 1.91 (0.55)                                          | 0.09                       |
| <b>Carbohydrates (g/serving)</b>                        | 19.4 (3.3)                                               | 18.7 (3.3)                                           | 0.00 <sup>h</sup>          |
| <b>Carbohydrates Healthy(g/serving)</b>                 | 6.7 (3.0)                                                | 6.1 (2.8)                                            | 0.00 <sup>h</sup>          |

|                                                                                                                                                                                                                    |              |               |                    |
|--------------------------------------------------------------------------------------------------------------------------------------------------------------------------------------------------------------------|--------------|---------------|--------------------|
| <b>Carbohydrates Unhealthy (g/serving)</b>                                                                                                                                                                         | 12.7 (3.4)   | 12.6 (3.4)    | 0.16               |
| <b>Fat (g/serving)</b>                                                                                                                                                                                             | 4.6 (1.0)    | 4.6 (1.0)     | 0.02               |
| <b>Fat Healthy (g/serving)</b>                                                                                                                                                                                     | 1.4 (0.59)   | 1.3 (0.57)    | 0.00 <sup>h</sup>  |
| <b>Fat Unhealthy (g/serving)</b>                                                                                                                                                                                   | 3.2 (0.97)   | 3.3 (0.96)    | <0.00 <sup>h</sup> |
| <b>Fiber (g/serving)</b>                                                                                                                                                                                           | 0.8 (0.32)   | 0.6 (0.3)     | 0.00 <sup>h</sup>  |
| <b>Fiber Healthy (g/serving)</b>                                                                                                                                                                                   | 0.3 (0.24)   | 0.3 (0.22)    | 0.00 <sup>h</sup>  |
| <b>Fiber Unhealthy (g/serving)</b>                                                                                                                                                                                 | 0.5 (0.19)   | 0.76 (.30)    | 0.19               |
| <b>Sodium (mg/serving)</b>                                                                                                                                                                                         | 220.7 (50.0) | 212.3 (120.0) | 0.03               |
| <b>Sodium Healthy (mg/serving)</b>                                                                                                                                                                                 | 85.0 (34.0)  | 84.8 (120.3)  | 0.91               |
| <b>Sodium Unhealthy (mg/serving)</b>                                                                                                                                                                               | 124.8 (36.6) | 127.5 (37.0)  | 0.00 <sup>h</sup>  |
| <b>Calories (kCal/serving)</b>                                                                                                                                                                                     | 132.6 (16.5) | 128.8 (17.1)  | 0.00 <sup>h</sup>  |
| <b>Calories Healthy (kcal/serving)</b>                                                                                                                                                                             | 46.7 (16.6)  | 42.7 (15.8)   | 0.00 <sup>h</sup>  |
| <b>Calories Unhealthy (kcal/serving)</b>                                                                                                                                                                           | 85.9 (20.1)  | 86.1 (19.6)   | 0.18               |
| kcal: Kilocalorie; g: gram, mg: milligram                                                                                                                                                                          |              |               |                    |
| <sup>a</sup> 15 food categories include: CSDs, cereals, crackers, ice cream, milk, juices, salty snacks, soup, cheese, cookies, frozen dinners, processed meats, yogurt, baked goods/desserts, candy/confectionary |              |               |                    |
| <sup>b</sup> Perceived Healthy= Cereal, cheese, crackers, juices, milk, soup, and yogurt                                                                                                                           |              |               |                    |
| <sup>c</sup> Perceived Unhealthy= cookies, CSDs, ice cream, frozen dinners, processed meats, salty snacks, baked goods/desserts, candy/confectionary                                                               |              |               |                    |
| <sup>d</sup> P-value calculated using Chi square and 2-sample T-test for categorical and continuous variables, respectively                                                                                        |              |               |                    |
| <sup>e</sup> Expressed as one-year monthly averaged weighed serving per capita                                                                                                                                     |              |               |                    |
| <sup>f</sup> Expressed as one-year monthly average weighed per capita                                                                                                                                              |              |               |                    |
| <sup>g</sup> Expressed as one-year monthly average weighed per capita, per serving                                                                                                                                 |              |               |                    |
| <sup>h</sup> Statistically significant using Holms step-down correction applied for multiple comparison across 15 food and drink categories                                                                        |              |               |                    |
