# Supplementary material for: Quantifying differences in packaged food and drink purchases among households with diet-related cardiometabolic multi-morbidity: a cross-sectional analysis
Source: Springer Nature journal article supplement (doi:10.1186/s12889-022-14626-3), 2022-11-17
Supplement: MOESM9 [file 23723250]

Additional File 9. Adjusted<sup>a</sup> odds ratios of diet-related cardiometabolic multi-morbid households relative to monthly weighed per capita nutrients per serving, controlling for calories per capita from food & drinks<sup>b</sup> and when grouped into perceived healthy<sup>c</sup> and unhealthy<sup>d</sup> with inclusion of baked goods/desserts and candy/confectionary

|                                                                                                                                                                                                                                                                                                                                                                                                         | Coefficient | Odds Ratio | Standard Error | 95% Confidence Interval | P Value <sup>e</sup> |
|---------------------------------------------------------------------------------------------------------------------------------------------------------------------------------------------------------------------------------------------------------------------------------------------------------------------------------------------------------------------------------------------------------|-------------|------------|----------------|-------------------------|----------------------|
| <b>Model 1: Across all 15 Food &amp; Drink Categories</b>                                                                                                                                                                                                                                                                                                                                               |             |            |                |                         |                      |
| <b>Protein (g/serving)</b>                                                                                                                                                                                                                                                                                                                                                                              | -0.19       | 0.83       | 0.02           | 0.79, 0.87              | 0.000 <sup>e</sup>   |
| <b>Carbohydrates (g/serving)</b>                                                                                                                                                                                                                                                                                                                                                                        | -0.07       | 0.94       | 0.01           | 0.93, 0.95              | 0.000 <sup>e</sup>   |
| <b>Fat (g/serving)</b>                                                                                                                                                                                                                                                                                                                                                                                  | -0.09       | 0.91       | 0.02           | 0.88, 0.95              | 0.000 <sup>e</sup>   |
| <b>Fiber (g/serving)</b>                                                                                                                                                                                                                                                                                                                                                                                | 0.05        | 1.05       | 0.07           | 0.92, 1.21              | 0.450                |
| <b>Sodium (mg/serving)</b>                                                                                                                                                                                                                                                                                                                                                                              | 0.00        | 1.00       | 0.00           | 1.00, 1.00              | 0.000 <sup>e</sup>   |
| <b>Calories (kcal/capita- 0.5 SD Kcal)</b>                                                                                                                                                                                                                                                                                                                                                              | 0.06        | 1.06       | 0.01           | 1.04, 1.08              | 0.000 <sup>e</sup>   |
| <b>Model 2: Perceived Healthy Food &amp; Drinks</b>                                                                                                                                                                                                                                                                                                                                                     |             |            |                |                         |                      |
| <b>Protein (g/serving)</b>                                                                                                                                                                                                                                                                                                                                                                              | -0.07       | 0.93       | 0.03           | 0.88, 0.99              | 0.023 <sup>e</sup>   |
| <b>Carbohydrates (g/serving)</b>                                                                                                                                                                                                                                                                                                                                                                        | -0.07       | 0.93       | 0.01           | 0.92, 0.95              | 0.000 <sup>e</sup>   |
| <b>Fat (g/serving)</b>                                                                                                                                                                                                                                                                                                                                                                                  | -0.16       | 0.85       | 0.03           | 0.80, 0.91              | 0.000 <sup>e</sup>   |
| <b>Fiber (g/serving)</b>                                                                                                                                                                                                                                                                                                                                                                                | 0.08        | 1.08       | 0.09           | 0.91, 1.29              | 0.373                |
| <b>Sodium (mg/serving)</b>                                                                                                                                                                                                                                                                                                                                                                              | 0.00        | 1.00       | 0.00           | 1.00, 1.00              | 0.000 <sup>e</sup>   |
| <b>Calories Healthy (kcal/capita- 0.5 SD Kcal)</b>                                                                                                                                                                                                                                                                                                                                                      | 0.00        | 1.00       | 0.00           | 1.00, 1.00              | 0.000 <sup>e</sup>   |
| <b>Model 3: Perceived Unhealthy Food &amp; Drinks</b>                                                                                                                                                                                                                                                                                                                                                   |             |            |                |                         |                      |
| <b>Protein (g/serving)</b>                                                                                                                                                                                                                                                                                                                                                                              | -0.32       | 0.73       | 0.07           | 0.64, 0.83              | 0.000 <sup>e</sup>   |
| <b>Carbohydrates (g/serving)</b>                                                                                                                                                                                                                                                                                                                                                                        | -0.04       | 0.96       | 0.01           | 0.95, 0.98              | 0.000 <sup>e</sup>   |
| <b>Fat (g/serving)</b>                                                                                                                                                                                                                                                                                                                                                                                  | -0.08       | 0.92       | 0.03           | 0.87, 0.97              | 0.004 <sup>e</sup>   |
| <b>Fiber (g/serving)</b>                                                                                                                                                                                                                                                                                                                                                                                | 0.00        | 1.00       | 0.18           | 0.70, 1.43              | 0.991                |
| <b>Sodium (mg/serving)</b>                                                                                                                                                                                                                                                                                                                                                                              | 0.01        | 1.01       | 0.00           | 1.01, 1.01              | 0.000 <sup>e</sup>   |
| <b>Calories Unhealthy (kcal/capita- 0.5 SD kcal)</b>                                                                                                                                                                                                                                                                                                                                                    | 0.00        | 1.00       | 0.00           | 1.02, 1.00              | 0.000 <sup>e</sup>   |
| kcal: Kilocalorie; SD: Standard deviation.                                                                                                                                                                                                                                                                                                                                                              |             |            |                |                         |                      |
| <sup>a</sup> Models adjusted for household size, head(s) of household BMI, maximum age for head(s) of household, self-identified race/ethnicity of household, maximum education attainment for head(s) of household, household income, marital status, physical activity, year of data collection, and average total calories per capita available from packaged food and drinks in the home each month |             |            |                |                         |                      |
| <sup>b</sup> Food and drink categories include 15 categories related to diet: CSDs, cereals, crackers, ice cream, milk, juices, salty snacks, soup, cheese, cookies, frozen dinners, processed meats, yogurt, baked goods/desserts, candy/confectionary                                                                                                                                                 |             |            |                |                         |                      |
| <sup>c</sup> Perceived Healthy= Cereal, cheese, crackers, milk, soup, and yogurt                                                                                                                                                                                                                                                                                                                        |             |            |                |                         |                      |
| <sup>d</sup> Perceived Unhealthy= cookies, ice cream, frozen dinners, processed meats, salty snacks, baked goods/desserts, candy/confectionary                                                                                                                                                                                                                                                          |             |            |                |                         |                      |
| <sup>e</sup> Statistically significant using Holms step-down correction applied for multiple comparison across 15 food and drink categories                                                                                                                                                                                                                                                             |             |            |                |                         |                      |
