# Supplementary material for: Quantifying differences in packaged food and drink purchases among households with diet-related cardiometabolic multi-morbidity: a cross-sectional analysis
Source: Springer Nature journal article supplement (doi:10.1186/s12889-022-14626-3), 2022-11-17
Supplement: MOESM10 [file 23723250]

Additional file 10. Adjusted<sup>a</sup> odds ratios of diet-related cardiometabolic multimorbid households relative to monthly weighed per capita nutrients per serving, controlling for calories per capita from all food & drinks<sup>b</sup> and when grouped into perceived healthy<sup>c</sup> and unhealthy<sup>d</sup>, excluding carbonated soft drinks and juices and including baked goods/desserts and candy/confectionary

|                                                                                                                                                                                                                                                                                                                                                                                                         | Coefficient | Odds Ratio | Standard Error | 95% Confidence Interval | P Value <sup>e</sup> |
|---------------------------------------------------------------------------------------------------------------------------------------------------------------------------------------------------------------------------------------------------------------------------------------------------------------------------------------------------------------------------------------------------------|-------------|------------|----------------|-------------------------|----------------------|
| <b>Model 1: Across all 13 Food &amp; Drink Categories</b>                                                                                                                                                                                                                                                                                                                                               |             |            |                |                         |                      |
| <b>Protein (g/serving)</b>                                                                                                                                                                                                                                                                                                                                                                              | -0.11       | 0.90       | 0.02           | 0.85, 0.95              | 0.000 <sup>e</sup>   |
| <b>Carbohydrates (g/serving)</b>                                                                                                                                                                                                                                                                                                                                                                        | -0.04       | 0.96       | 0.01           | 0.95, 0.98              | 0.000 <sup>e</sup>   |
| <b>Fat (g/serving)</b>                                                                                                                                                                                                                                                                                                                                                                                  | -0.03       | 0.97       | 0.02           | 0.94, 1.00              | 0.091                |
| <b>Fiber (g/serving)</b>                                                                                                                                                                                                                                                                                                                                                                                | -0.02       | 0.98       | 0.07           | 0.85, 1.11              | 0.794                |
| <b>Sodium (mg/serving)</b>                                                                                                                                                                                                                                                                                                                                                                              | 0.00        | 1.00       | 0.00           | 1.00, 1.00              | 0.000 <sup>e</sup>   |
| <b>Calories (kcal/capita- 0.5 SD Kcal)</b>                                                                                                                                                                                                                                                                                                                                                              | 0.05        | 1.05       | 0.01           | 1.03, 1.07              | 0.000 <sup>e</sup>   |
| <b>Model 2: Perceived Healthy Food &amp; Drinks</b>                                                                                                                                                                                                                                                                                                                                                     |             |            |                |                         |                      |
| <b>Protein (g/serving)</b>                                                                                                                                                                                                                                                                                                                                                                              | -0.08       | 0.92       | 0.03           | 0.87, 0.97              | 0.001 <sup>e</sup>   |
| <b>Carbohydrates (g/serving)</b>                                                                                                                                                                                                                                                                                                                                                                        | -0.01       | 0.99       | 0.01           | 0.97, 1.01              | 0.150                |
| <b>Fat (g/serving)</b>                                                                                                                                                                                                                                                                                                                                                                                  | -0.06       | 0.95       | 0.03           | 0.89, 0.99              | 0.036                |
| <b>Fiber (g/serving)</b>                                                                                                                                                                                                                                                                                                                                                                                | -0.20       | 0.82       | 0.08           | 0.66, 0.98              | 0.015 <sup>e</sup>   |
| <b>Sodium (mg/serving)</b>                                                                                                                                                                                                                                                                                                                                                                              | 0.00        | 1.00       | 0.00           | 1.00, 1.00              | 0.000 <sup>e</sup>   |
| <b>Calories Healthy (kcal/capita- 0.5 SD Kcal)</b>                                                                                                                                                                                                                                                                                                                                                      | 0.00        | 1.00       | 0.00           | 1.00, 1.00              | 0.000 <sup>e</sup>   |
| <b>Model 3: Perceived Unhealthy Food &amp; Drinks</b>                                                                                                                                                                                                                                                                                                                                                   |             |            |                |                         |                      |
| <b>Protein (g/serving)</b>                                                                                                                                                                                                                                                                                                                                                                              | -0.11       | 0.89       | 0.05           | 0.80, 0.99              | 0.021                |
| <b>Carbohydrates (g/serving)</b>                                                                                                                                                                                                                                                                                                                                                                        | -0.04       | 0.96       | 0.01           | 0.94, 0.98              | 0.000 <sup>e</sup>   |
| <b>Fat (g/serving)</b>                                                                                                                                                                                                                                                                                                                                                                                  | 0.03        | 1.03       | 0.02           | 0.98, 1.08              | 0.197                |
| <b>Fiber (g/serving)</b>                                                                                                                                                                                                                                                                                                                                                                                | 0.26        | 1.30       | 0.16           | 0.98, 1.62              | 0.105                |
| <b>Sodium (mg/serving)</b>                                                                                                                                                                                                                                                                                                                                                                              | 0.00        | 1.00       | 0.00           | 1.00, 1.00              | 0.000 <sup>e</sup>   |
| <b>Calories Unhealthy (kcal/capita- 0.5 SD Kcal)</b>                                                                                                                                                                                                                                                                                                                                                    | 0.00        | 1.00       | 0.00           | 1.00, 1.00              | 0.000 <sup>e</sup>   |
| kcal: Kilocalorie; SD: Standard deviation.                                                                                                                                                                                                                                                                                                                                                              |             |            |                |                         |                      |
| <sup>a</sup> Models adjusted for household size, head(s) of household BMI, maximum age for head(s) of household, self-identified race/ethnicity of household, maximum education attainment for head(s) of household, household income, marital status, physical activity, year of data collection, and average total calories per capita available from packaged food and drinks in the home each month |             |            |                |                         |                      |
| <sup>b</sup> 13 food categories include: Cereals, crackers, ice cream, milk, salty snacks, soup, cheese, cookies, frozen dinners, processed meats, yogurt, baked goods/desserts, candy/confectionary                                                                                                                                                                                                    |             |            |                |                         |                      |
| <sup>c</sup> Perceived Healthy= Cereal, cheese, crackers, milk, soup, and yogurt                                                                                                                                                                                                                                                                                                                        |             |            |                |                         |                      |
| <sup>d</sup> Perceived Unhealthy= cookies, ice cream, frozen dinners, processed meats, salty snacks, baked goods/desserts, candy/confectionary                                                                                                                                                                                                                                                          |             |            |                |                         |                      |
| <sup>e</sup> Statistically significant using Holms step-down correction applied for multiple comparison across 13 food and drink categories                                                                                                                                                                                                                                                             |             |            |                |                         |                      |
